# Supplementary material for: A murine specific expansion of the Rhox cluster involved in embryonic stem cell biology is under natural selection
Source: PubMed Central journal article supplement (PMC1562416; doi:10.1186/1471-2164-7-212), 2006-08-17
Supplement: 1471-2164-7-212-S3.pdf [file 1471-2164-7-212-S3.pdf]

# Rhox3

A

## variant nucleotides

-29---50--203--206--450--525--546--712--746--751-

|               |   |   |   |   |   |   |   |   |   |   |
|---------------|---|---|---|---|---|---|---|---|---|---|
| <i>rhox3A</i> | G | G | G | A | G | T | A | C | C | G |
| <i>rhox3B</i> | A | G | G | A | A | T | A | C | T | T |
| <i>rhox3C</i> | G | G | C | G | G | T | A | C | T | G |
| <i>rhox3D</i> | G | G | G | A | G | A | T | C | T | T |
| <i>rhox3E</i> | G | G | G | A | G | T | A | C | C | A |
| <i>rhox3F</i> | G | C | C | G | G | T | A | A | C | T |
| <i>rhox3G</i> | A | C | G | G | G | T | A | A | C | T |
| <i>rhox3H</i> | G | C | C | G | A | T | A | C | T | T |

B

|               |                                                                                          |            |
|---------------|------------------------------------------------------------------------------------------|------------|
| <b>RHOX3A</b> | MKPERSISNWIHSNVERAGRNL FQVNGHRSALLPELPQDYHRASRSVNGCETKMDSTQGT                            | <b>60</b>  |
| <b>RHOX3B</b> | MKPERSISN-----                                                                           | <b>9</b>   |
| <b>RHOX3C</b> | MKPERSISNWIHSNVERAGRNL FQVNGHRSALLPELPQDYHRASRSV <b>Y</b> GCETKMDSTQGT                   | <b>60</b>  |
| <b>RHOX3D</b> | MKPERSISNWIHSNVERAGRNL FQVNGHRSALLPELPQDYHRASRSVNGCETKMDSTQGT                            | <b>60</b>  |
| <b>RHOX3E</b> | MKPERSISNWIHSNVERAGRNL FQVNGHRSALLPELPQDYHRASRSVNGCETKMDSTQGT                            | <b>60</b>  |
| <b>RHOX3F</b> | MKPERS <b>M</b> SNWIHSNVE <b>P</b> AGRNL FQVNGHRSALLPELPQDYHRASRSVNGCETKMD <b>N</b> TQGT | <b>60</b>  |
| <b>RHOX3G</b> | MKPERSISN-----                                                                           | <b>9</b>   |
| <b>RHOX3H</b> | MKPERSISNWIHSNVE <b>P</b> AGRNL FQVNGHRSALLPELPQDYHRASRSVNGCETKMDSTQGT                   | <b>60</b>  |
| <b>RHOX3A</b> | KVLPAAEEGKNEEDGGQVESALGATAARGRGKEALNGESPAAAGTAGLVEEDRNKEDGGTK                            | <b>120</b> |
| <b>RHOX3B</b> | -----                                                                                    | <b>-</b>   |
| <b>RHOX3C</b> | KVLPAAEE <b>AR</b> NEEDGGQVESALGATAARGRGKEALNGESPAAAGTAGLVEEDRNKEDGGTK                   | <b>120</b> |
| <b>RHOX3D</b> | KVLPAAEEGKNEEDGGQVESALGATAARGRGKEALNGESPAAAGTAGLVEEDRNKEDGGTK                            | <b>120</b> |
| <b>RHOX3E</b> | KVLPAAEEGKNEEDGGQVESALGATAARGRGKEALNGESPAAAGTAGLVEEDRNKEDGGTK                            | <b>120</b> |
| <b>RHOX3F</b> | KVLPAAEE <b>AR</b> NEEDGGQVESALGATAARGRGKEALNGESPAAAGTAGLVEEDRNKEDGGTK                   | <b>120</b> |
| <b>RHOX3G</b> | -----                                                                                    | <b>-</b>   |
| <b>RHOX3H</b> | KVLPAAEE <b>SR</b> NEEDGGQVESALGATAARGRGKEALNGESPAAAGTAGLVEEDRNKEDGGTK                   | <b>120</b> |
| <b>RHOX3A</b> | GGEKNEQEVREQIPEHVEGESDQAEAPRQVPRRRLHHRFTQWQLDELERIFRMNYFLSLE                             | <b>180</b> |
| <b>RHOX3B</b> | -----                                                                                    | <b>-</b>   |
| <b>RHOX3C</b> | GGEKNEQEVREQIPEHVEGESDQAEAPRQVPRRRLHHRFTQWQLDELERIFRMNYFLSLE                             | <b>180</b> |
| <b>RHOX3D</b> | GGEKNEQEVREQIPEHVEGESDQAEAPRQVPRRRLHHRFTQWQLDELERIFRMN-----                              | <b>174</b> |
| <b>RHOX3E</b> | GGEKNEQEVREQIPEHVEGESDQAEAPRQVPRRRLHHRFTQWQLDELERIFRMNYFLSLE                             | <b>180</b> |
| <b>RHOX3F</b> | GGEKNEQEVREQIPEHVEGESDQAE <b>L</b> RQVPRRRLHHRFTQWQLDELERIFRMNYFLSLE                     | <b>180</b> |
| <b>RHOX3G</b> | -----                                                                                    | <b>-</b>   |
| <b>RHOX3H</b> | GGEKNEQEVREQIPEHVEGESDQAEAPRQVPRRRLHHRFTQWQLDELERIFRMNYFLSLE                             | <b>180</b> |
| <b>RHOX3A</b> | ++ ++ + + ***** *                                                                        | <b>213</b> |
| <b>RHOX3B</b> | -----                                                                                    | <b>-</b>   |
| <b>RHOX3C</b> | ARKQLARWGMVNEAIVKRFQKRREQYRWKRL                                                          | <b>213</b> |
| <b>RHOX3D</b> | -----                                                                                    | <b>174</b> |
| <b>RHOX3E</b> | ARKQLARWGMVNEAIVKRFQKRREQYRWKRL                                                          | <b>213</b> |
| <b>RHOX3F</b> | ARKQLARWGMVNEAIVKRFQKRRE <b>K</b> YRWKRL                                                 | <b>213</b> |
| <b>RHOX3G</b> | -----                                                                                    | <b>-</b>   |
| <b>RHOX3H</b> | <u>ARKQLARWGMVNEAIVKRFQKRREQYRWKRL</u>                                                   | <b>213</b> |

### Additional File 3

A. Unique nucleotide profile of predicted *rhox3A-H* transcripts. The position of the nucleotides is given relative to the published start site. B. Clustal W alignment of predicted amino acid sequence from *rhox3A-H*. Residues different from the consensus are highlighted in blue (conservative amino acid change) or red (non-conservative amino acid change). The homeobox domain is underlined with hydrophobic residues (+) crucial for homeodomain packing and residues involved in DNA binding (\*) annotated.
