# Supplementary material for: A murine specific expansion of the Rhox cluster involved in embryonic stem cell biology is under natural selection
Source: PubMed Central journal article supplement (PMC1562416; doi:10.1186/1471-2164-7-212), 2006-08-17
Supplement: 1471-2164-7-212-S4.pdf [file 1471-2164-7-212-S4.pdf]

**A**

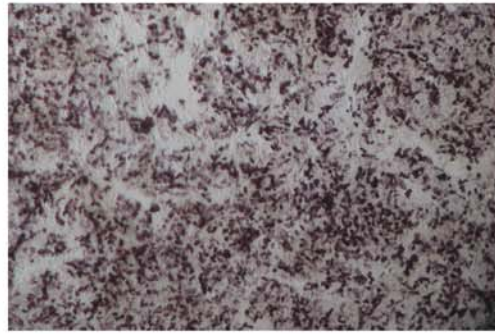

**B**

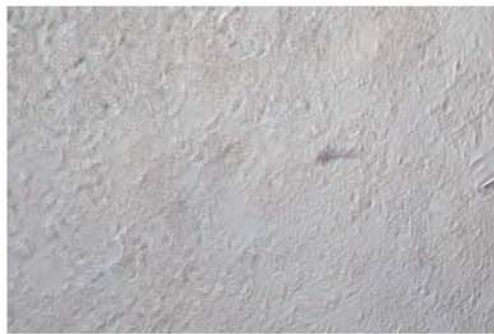

**C**

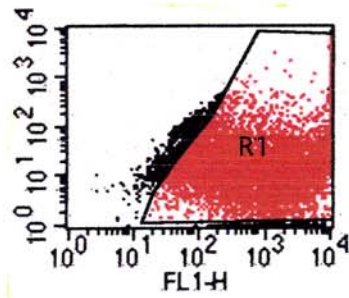

**Additional file 4.**

*In Situ* hybridisation of a digoxigenin labelled *Rhox2* labelled sense riboprobe to E14/T ES cells supertransfected with *Rhox2* anti-sense (A) or eGFP (B) expression constructs. (C) Flow cytometry of eGFP expressing cells demonstrate a 93% transfection efficiency.
